# Supplementary material for: Intensity of outpatient physician care in the last year of life: a population-based retrospective descriptive study
Source: PubMed Central journal article supplement — CMAJ Open. 2021 Jun 4;9(2):E613–22. doi: 10.9778/cmajo.20210039 (PMC8191591; doi:10.9778/cmajo.20210039), 2021-06-04
Supplement: supp_9.2.E613_2021-0039-1-at.pdf [file supp_9.2.E613_2021-0039-1-at.pdf]

**Supplementary File 1: Description of health administrative databases held at ICES used in study**

| NAME OF DATABASE                                  | DATABASE CONTENT                                                                                                                                                                                                                                                                                                                                                                                                                                                                                                                                                                                                      |
|---------------------------------------------------|-----------------------------------------------------------------------------------------------------------------------------------------------------------------------------------------------------------------------------------------------------------------------------------------------------------------------------------------------------------------------------------------------------------------------------------------------------------------------------------------------------------------------------------------------------------------------------------------------------------------------|
| ICES-derived cohorts                              | Validated cohorts of individuals with specific diseases and conditions. These include: Ontario Asthma Dataset (ASTHMA) <sup>1</sup> ; Congestive Heart Failure (CHF) database <sup>2</sup> ; Chronic Obstructive Pulmonary Disease (COPD) database <sup>3</sup> ; Ontario Dementia Dataset (DEMENTIA) <sup>4</sup> ; Ontario Hypertension Dataset (HYPER) <sup>5</sup> ; Ontario Crohn's and Colitis Cohort Dataset (OCCC) <sup>6</sup> ; Ontario Diabetes Dataset (ODD) <sup>7</sup> ; Ontario Myocardial Infarction Dataset (OMID) <sup>8</sup> ; and the Ontario Rheumatoid Arthritis Dataset (ORAD). <sup>9</sup> |
| Ontario Health Insurance Plan database (OHIP)     | These data record all claims by Ontario physicians for inpatient and ambulatory visits, consultations and procedures. The data also include claims from optometrists for publicly funded reimbursement and from laboratories for all diagnostic tests performed.                                                                                                                                                                                                                                                                                                                                                      |
| Ontario Registered Persons Database (RPDB)        | Demographic, place of residence and vital status information for all persons eligible to receive insured health services in the province, including date of birth, sex, home address.                                                                                                                                                                                                                                                                                                                                                                                                                                 |
| Ontario Registrar General – Deaths (ORG) database | This database contains information (demographic, place of death, cause of death) for all decedents in Ontario. Causes of death are coded in ICD-10. ICES uses a combination of death certificate antecedent cause, and if incomplete, the immediate causes, therefore the cause of death used in analyses is based on multiple sources of death certificate information combined using Becker's leading cause of death method. <sup>10</sup>                                                                                                                                                                          |
| Home Care Database (HCD)                          | This dataset contains clinical information for home care recipients. Information includes assessments, program admission dates, and service records.                                                                                                                                                                                                                                                                                                                                                                                                                                                                  |
| Ontario Drug Benefit Claims (ODB) and             | This database contains information (recipients, payments, claims, practitioners) for the Ontario Drug Benefit Program. Drug identification number is provided by IQVIA Solutions Canada Inc. These databases are used in the creation of ICES-derived cohorts.                                                                                                                                                                                                                                                                                                                                                        |
| Discharge Abstract Database (DAD)                 | This data captures patient-level information (administrative, clinical, and demographic) on hospital discharges. Discharges include deaths, sign-outs, and transfers to other healthcare settings.                                                                                                                                                                                                                                                                                                                                                                                                                    |

1. Gershon AS, Wang C, Guan J, Vasilevska-Ristovska J, Cicutto L, To T. Identifying patients with physician-diagnosed asthma in health administrative databases. *Can Respir J*. 2009;16:183-8.

2. Schultz SE, Rothwell DM, Chen Z, Tu K. Identifying cases of congestive heart failure from administrative data: a validation study using primary care patient records. *Chronic Dis Inj Can.* 2013;33:160-6.
3. Gershon AS, Wang C, Guan J, Vasilevska-Ristovska J, Cicutto L, To T. Identifying individuals with physician diagnosed COPD in health administrative databases. *COPD.* 2009;6:388-94.
4. Jaakkimainen RL, Bronskill SE, Tierney MC, et al. Identification of Physician-Diagnosed Alzheimer's Disease and Related Dementias in Population-Based Administrative Data: A Validation Study Using Family Physicians' Electronic Medical Records. *J Alzheimers Dis.* 2016;54:337-49.
5. Tu K, Campbell NR, Chen ZL, Cauch-Dudek KJ, McAlister FA. Accuracy of administrative databases in identifying patients with hypertension. *Open Med.* 2007;1:e18-26.
6. Benchimol EI, Guttmann A, Mack DR, et al. Validation of international algorithms to identify adults with inflammatory bowel disease in health administrative data from Ontario, Canada. *J Clin Epidemiol.* 2014;67:887-96.
7. Hux JE, Ivis F, Flintoft V, Bica A. Diabetes in Ontario: determination of prevalence and incidence using a validated administrative data algorithm. *Diabetes Care.* 2002;25:512-6.
8. Austin PC, Daly PA, Tu JV. A multicenter study of the coding accuracy of hospital discharge administrative data for patients admitted to cardiac care units in Ontario. *Am Heart J.* 2002;144:290-6.
9. Widdifield J, Bombardier C, Bernatsky S, et al. An administrative data validation study of the accuracy of algorithms for identifying rheumatoid arthritis: the influence of the reference standard on algorithm performance. *BMC Musculoskelet Disord.* 2014;15:216.
10. Becker R, Silva J, D. MF, L'Hours A, Laurenti R. A method for deriving leading causes of death. *Bulletin of the World Health Organization.* 2006;84:297-304.
