# Supplementary material for: Intensity of outpatient physician care in the last year of life: a population-based retrospective descriptive study
Source: PubMed Central journal article supplement — CMAJ Open. 2021 Jun 4;9(2):E613–22. doi: 10.9778/cmajo.20210039 (PMC8191591; doi:10.9778/cmajo.20210039), 2021-06-04
Supplement: supp_9.2.E613_2021-0039-2-at.pdf [file supp_9.2.E613_2021-0039-2-at.pdf]

**Supplementary File 2: Top 15 causes of death, per end-of-life trajectory.**

|   | Terminal Illness<br>ICD10 Code,<br>Description, Frequency<br>(%)       | Organ Failure<br>ICD10 Code, Description,<br>Frequency (%)                                                             | End-of-life Trajectory                                          |                                                                                                                                                              | Other<br>ICD10 Code,<br>Description, Frequency<br>(%)                     |
|---|------------------------------------------------------------------------|------------------------------------------------------------------------------------------------------------------------|-----------------------------------------------------------------|--------------------------------------------------------------------------------------------------------------------------------------------------------------|---------------------------------------------------------------------------|
|   |                                                                        |                                                                                                                        | Frailty<br>ICD10 Code, Description,<br>Frequency (%)            | Sudden Death<br>ICD10 Code, Description, Frequency (%)                                                                                                       |                                                                           |
| 1 | C349, Malignant neoplasm of bronchus and lung, 24578 (19.7%)           | J449, Chronic obstructive pulmonary disease, unspecified, 9,347 (7.8%)                                                 | I251, Atherosclerotic heart disease, 23841 (31.9%)              | W76, Other accidental hanging and strangulation, 1876 (9.9%)                                                                                                 | A419, Sepsis, unspecified, 3172 (15.1%)                                   |
| 2 | C799, Secondary malignant neoplasm, unspecified site, 17749 (14.2%)    | I10, Essential (primary) hypertension, 7790 (6.5%)                                                                     | J189, Pneumonia, unspecified, 11979 (16.0%)                     | R97, Abnormal tumour markers, 1764 (9.3%)                                                                                                                    | W18, Other fall on same level, 2323 (11.1%)                               |
| 3 | C800, Malignant neoplasm, primary site unknown, so stated, 7544 (6.0%) | I5009, Heart Failure, 7342 (6.1%)                                                                                      | F03, Unspecified dementia, 9178 (12.3%)                         | X42, Accidental poisoning by and exposure to narcotics and psychodysleptics [hallucinogens], not elsewhere classified, 1485 (7.8%)                           | W19, Unspecified fall, 2169 (10.3%)                                       |
| 4 | C259, Malignant neoplasm pancreas part unspecified, 5612 (4.5%)        | I6409, Stroke, not specified as haemorrhage or infarction, 6704 (5.6%)                                                 | I2199, Acute myocardial infarction, 8133 (10.9%)                | W80, Inhalation and ingestion of other objects causing obstruction of respiratory tract, 871 (4.6%)                                                          | R999, Other ill-defined and unspecified causes of mortality, 1384 (6.6%)  |
| 5 | C61, Malignant neoplasm of prostate, 5313 (4.3%)                       | I489, Atrial fibrillation and flutter, 4465 (3.7%)                                                                     | I259, Chronic ischaemic heart disease, unspecified, 2815 (3.8%) | X41, Accidental poisoning by and exposure to antiepileptic, sedative-hypnotic, antiparkinsonism and psychotropic drugs, not elsewhere classified, 853 (4.5%) | W10, Fall on and from stairs and steps, 753 (3.6%)                        |
| 6 | C189, Malignant neoplasm colon, unspecified, 4463 (3.6%)               | E149, Unspecified diabetes mellitus without (mention of) complication, 3637 (3.0%)                                     | J690, Pneumonitis due to food and vomit, 2585 (3.5%)            | X590, Exposure to unspecified factor causing fracture, 840 (4.4%)                                                                                            | R688, Other specified general symptoms and signs, 684 (3.3%)              |
| 7 | C509, Malignant neoplasm of breast, 4370 (3.5%)                        | J841, Other interstitial pulmonary diseases with fibrosis, 2884 (2.4%)                                                 | G309, Alzheimer's disease, unspecified, 1509 (2.0%)             | X45, Accidental poisoning by and exposure to alcohol, 793 (4.2%)                                                                                             | W01, Fall on same level from slipping, tripping and stumbling, 540 (2.6%) |
| 8 | C159, Malignant lesion oesophagus unspecified, 2308 (1.8%)             | N390, Urinary tract infection, site not specified, 2630 (2.2%)                                                         | G2009, Parkinson's disease, 1370 (1.8%)                         | X44, Accidental poisoning by and exposure to other and unspecified drugs, medicaments and biological substances, 710 (3.7%)                                  | R53, Malaise and fatigue, 529 (2.5%)                                      |
| 9 | N189, Chronic kidney disease, unspecified, 2251 (1.8%)                 | F179, Mental and behavioural disorders due to use of tobacco, unspecified mental and behavioural disorder, 2554 (2.1%) | R54, Senility, 1240 (1.7%)                                      | X599, Exposure to unspecified factor causing other and unspecified injury, 454 (2.4%)                                                                        | R13, Dysphagia, 483 (2.3%)                                                |

|    |                                                                                                                              |                                                                |                                                                        |                                                                                                    |                                                     |
|----|------------------------------------------------------------------------------------------------------------------------------|----------------------------------------------------------------|------------------------------------------------------------------------|----------------------------------------------------------------------------------------------------|-----------------------------------------------------|
| 10 | C859, Non-Hodgkin's lymphoma, unspecified type, 2145 (1.7%)<br>C679, Malignant neoplasm of bladder, unspecified, 2105 (1.7%) | K746, Other and unspecified cirrhosis of liver, 2313 (1.9%)    | I255, Ischaemic cardiomyopathy, 1143 (1.5%)                            | V892, Person injured in unspecified traffic motor-vehicle accident, 421 (2.2%)                     | F329, Depressive episode, unspecified, 474 (2.3%)   |
| 11 |                                                                                                                              | N19, Unspecified kidney failure, 2268 (1.9%)                   | G301, Alzheimer's disease with late onset, 880 (1.2%)                  | W34, Accidental discharge and malfunction from other and unspecified firearms and guns, 412 (2.2%) | R568, Other and unspecified convulsions, 303 (1.4%) |
| 12 | C900, Multiple myeloma, 2101 (1.7%)                                                                                          | I350, Aortic (valve) stenosis, 2097 (1.8%)                     | A047, Enterocolitis due to Clostridium difficile, 873 (1.2%)           | T405, Poisoning by cocaine, 345 (1.8%)                                                             | W06, Fall involving bed, 291 (1.4%)                 |
| 13 | C169, Malignant neoplasm stomach unspecified, 1897 (1.5%)                                                                    | I709, Generalized and unspecified atherosclerosis, 2066 (1.7%) | I250, Atherosclerotic cardiovascular disease, so described, 512 (0.7%) | X80, Intentional self-harm by jumping from a high place, 269 (1.4%)                                | R572, Septic shock, 277 (1.3%)                      |
| 14 | C439, Malignant melanoma of skin, unspecified, 1883 (1.5%)                                                                   | I469, Cardiac arrest, unspecified, 2005 (1.7%)                 | A099, Gastroenteritis and colitis of unspecified origin, 418 (0.6%)    | X47, Accidental poisoning by and exposure to other gases and vapours, 236 (1.2%)                   | R092, Respiratory arrest, 276 (1.3%)                |
| 15 | C56, Malignant neoplasm of ovary, 1841 (1.5%)                                                                                | K922, Gastrointestinal haemorrhage, unspecified, 1763 (1.5%)   | I214, Acute subendocardial myocardial infarction, 417 (0.6%)           | W79, Inhalation and ingestion of food causing obstruction of respiratory tract, 235 (1.2%)         | R64, Cachexia, 273 (1.3%)                           |
