# Supplementary material for: Intensity of outpatient physician care in the last year of life: a population-based retrospective descriptive study
Source: PubMed Central journal article supplement — CMAJ Open. 2021 Jun 4;9(2):E613–22. doi: 10.9778/cmajo.20210039 (PMC8191591; doi:10.9778/cmajo.20210039), 2021-06-04
Supplement: supp_9.2.E613_2021-0039-original-submission.pdf [file supp_9.2.E613_2021-0039-original-submission.pdf]

## Which physicians are providing care in outpatient settings in the last year of life? A population-based descriptive study

Word count: 2556

Number of tables: 2

Number of figures: 1

### Declaration of author(s)' competing interests

All authors declare that they have no competing interests

### Funding statement

This study was funded by a grant from the Canadian Institutes of Health Research project #159771. This study was supported by ICES, which is funded by an annual grant from the Ontario Ministry of Health and Long-Term Care.

Author for correspondence: Michelle Howard, [mhoward@mcmaster.ca](mailto:mhoward@mcmaster.ca)

| Name/Credentials/ORCID                                     | Affiliations                                                                        |
|------------------------------------------------------------|-------------------------------------------------------------------------------------|
| Michelle Howard, MSc, PhD<br>ORCID: 0000-0001-8127-5492    | Department of Family Medicine, McMaster University.                                 |
| Abe Hafid, MPH<br>ORCID: 0000-0002-2853-6881               | Department of Family Medicine, McMaster University.                                 |
| Sarina R. Isenberg, MA, PhD<br>ORCID: 0000-0001-6059-5366  | Bruyère Research Institute; University of Ottawa.                                   |
| Amy T. Hsu, PhD<br>ORCID: 0000-0002-2747-4121              | Bruyère Research Institute; Ottawa Hospital Research Institute.                     |
| Mary Scott, BA<br>ORCID: 0000-0002-1745-0820               | Bruyere Research Institute; Ottawa Hospital Research Institute.                     |
| Katrin Conen, MD                                           | Department of Medicine, McMaster University.                                        |
| Colleen Webber, PhD<br>ORCID: 0000-0001-9193-5386          | Ottawa Hospital Research Institute; Bruyère Research Institute.                     |
| Susan E. Bronskill, MSc, PhD<br>ORCID: 0000-0002-7341-0655 | ICES; Institute of Health Policy, Management and Evaluation, University of Toronto. |
| James Downar, MD, MHSc<br>ORCID: 0000-0001-7479-1560       | Division of Palliative Care, Department of Medicine, University of Ottawa.          |
| Peter Tanuseputro, MHSc, MD<br>ORCID: 0000-0002-4409-0795  | Bruyère Research Institute; Department of Medicine, University of Ottawa.           |

## ABSTRACT

**Background:** Patient experience and healthcare utilization end-of-life outcomes vary for different dying trajectories and physician care provided in outpatient settings can influence these outcomes. This study describes the volume and mix of outpatient physician care over the last year of life among decedents in Ontario, stratified by type of end-of-life trajectory.

**Methods:** We conducted a retrospective cohort study of people 18 years of age and older who died in Ontario between 2013 and 2016. Decedents were grouped into mutually exclusive end-of-life trajectories (terminal illness, organ failure, frailty, sudden death and other). Outpatient physician encounters (i.e. a billed visit with a physician outside hospital) were examined across trajectories and included the volume of encounters by setting and by specialty in the last 12 and 3 months of life.

**Results:** Decedents (n=374,388) were on average 77.1 years of age (interquartile range 68-88) and 49.8% were female. In the last 12 months of life, decedents had, on average, 16.2 outpatient physician encounters (standard deviation [SD] 15.3) across an average of 5.8 (SD 4.6) unique physicians. The mean number of encounters ranged from 9.9 (SD 11.3) in the frailty trajectory to 26.2 (SD 17.0) in the terminal illness trajectory across 3.8 (SD 3.7) to 8.7 (SD 4.7) unique physicians, respectively. In the last 3 months of life, the mean number of physician encounters was 6.1 (SD 6.9) across an average of 3.7 (SD 2.6) unique physicians.

**Interpretation:** Many physicians are involved in outpatient care in the last year of life and the volume and mix varies considerably by end-of-life trajectory. These results have implications for continuity of care and shared care near the end of life.

**Keywords:** Palliative care, Family Practice, Terminal care, Retrospective Studies, Ambulatory Care

## BACKGROUND

Our population is aging, and increasing numbers of people will require health care for at least one progressive life-limiting illness, often for several years until the end of life.<sup>1-3</sup> While approximately half of people in Canada die in a hospital and many experience unplanned admissions in the last year of life, the majority of time is spent in the community.

Formal palliative care is typically initiated late in the illness trajectory of patients,<sup>4-7</sup> even though for many patients, there is evidence of recognizable functional decline and poor prognosis at least a year before death.<sup>8,9</sup> Patients dying of organ failure or dementia are less likely to receive palliative care services or they receive them closer to end-of-life, compared to those with cancer.<sup>7,10</sup> Physicians working in the community provide care near the end of life either as specialists in palliative care or through a generalist palliative approach.<sup>5,11</sup> To achieve sustainable and equitable access to end of life care, it is widely accepted that palliative care will need to be integrated into the work of many types of providers (e.g. family physicians, oncologists).<sup>11-14</sup>

Medical specialists are often thought to provide care for the specific illness(es) that may be contributing to patients' decline (e.g., oncologist provides care for cancer or cardiologists for heart disease that may be life limiting), while family physicians may play the 'quarterback' role in organizing care between specialists.<sup>15</sup> Medical specialists may step back as patients move closer to death and are transitioned to palliative and end-of-life care provided by family physicians or palliative care physicians. With the likelihood of multiple physician involvement near the end of life, coordinated, continuous care is possibly disrupted.<sup>16,17</sup> Patients' needs for healthcare escalate in the last three months of life leading to a greater number of encounters with

1  
2  
3 the system.<sup>6,18,19</sup> Given the complex needs associated with many late stage illnesses, physician  
4 care near the end of life is likely to be provided by a mix of different specialties who may not  
5 necessarily communicate and care may not encompass a palliative approach.<sup>20</sup> Health care  
6 provided by various physicians, with varying intents, may be experienced as burdensome to  
7 individuals as they decline in health and function from life-limiting illnesses.<sup>21,22</sup>  
8  
9  
10  
11  
12  
13  
14  
15

16 We do not have a clear picture of outpatient physician care across different patient  
17 populations in the last year of life, a time when end-of-life healthcare needs increase for most  
18 patients. To address this knowledge gap, the objective of this study was to describe the volume  
19 and mix of outpatient physician care over the last 12 and 3 months of life among patients dying  
20 of different end-of-life trajectories, including with cancer, organ failure, frailty, and sudden  
21 death.  
22  
23  
24  
25  
26  
27  
28  
29

## 30 **METHODS**

### 31 **Study design and data sources**

32  
33  
34 We conducted a retrospective study using linked population-based health administrative  
35 databases in Ontario, Canada, held at ICES. ICES is an independent, non-profit research institute  
36 whose legal status under Ontario's health information privacy law allows it to collect and  
37 analyze health care and demographic data, without, consent for health system evaluation and  
38 improvement. The holdings include a comprehensive set of healthcare sectors in Ontario, which  
39 has a population of over 14 million residents with nearly universal health care coverage. These  
40 datasets were linked using unique encoded identifiers and analyzed at ICES. The use of data in  
41  
42  
43  
44  
45  
46  
47  
48  
49  
50  
51  
52  
53  
54  
55  
56  
57  
58  
59  
60

1  
2  
3 this project was authorized under section 45 of Ontario's Personal Health Information Protection  
4  
5 Act, which does not require review by a Research Ethics Board.  
6  
7

## 8 9 **Study Cohort**

10  
11  
12 We created a cohort comprised of all adult decedents (18+ years) who died between  
13  
14 January 1, 2013 and December 31, 2016. We excluded decedents who were older than 105 years  
15  
16 at death (in case of administrative error), or were ineligible for insured health services through  
17  
18 the Ontario Health Insurance Program (OHIP) at any point in the last year of life, who had an  
19  
20 address outside Ontario at time of death, who had no healthcare encounters in the five years prior  
21  
22 to death, or had no cause of death listed. Deaths were captured through the Registered Persons  
23  
24 Database (RPDB) and cause of death through the Ontario Registrar General – Deaths (ORGD)  
25  
26 database (see Supplementary File 1 for description of databases).  
27  
28  
29  
30  
31

32 We categorised decedents by the major trajectories of functional decline at end of life,  
33  
34 defined by main cause of death as per prior research,<sup>1,10,23</sup> a method that has been validated in  
35  
36 Canada using the International Classification of Diseases 10th Revision codes from the death  
37  
38 certificate.<sup>2,24</sup> Decedents were classified into these trajectories: terminal illness (e.g., cancer),  
39  
40 organ failure (e.g., chronic heart failure), frailty (e.g., Alzheimer's disease), sudden death (e.g.,  
41  
42 accident) and other.  
43  
44  
45  
46

## 47 **Decedent Characteristics**

48  
49  
50 Demographic characteristics were determined using information in databases pertaining  
51  
52 to the last year of life. Age at death and sex were obtained from the RPDB. Neighborhood level  
53  
54  
55  
56  
57  
58  
59  
60

1  
2  
3 income quintile and rurality were estimated using the Postal Code Conversion File Plus (PCCF+)  
4  
5 and patients' postal code from the RPDB.  
6  
7

8  
9 A history of any comorbidities was determined looking back from 2008 up to death via  
10  
11 previously developed algorithms that use diagnosis codes and medication data to assign  
12  
13 conditions.<sup>25-34</sup>  
14  
15

### 16 17 **Outcomes of Interest** 18 19

20  
21 This study focused on physician encounters in the outpatient setting (as opposed to  
22  
23 during a hospitalization) because we were interested in patterns of care in the community. These  
24  
25 encounters were identified using physician claims to the Ontario Health Insurance Plan (OHIP)  
26  
27 database. Multiple billings by the same physician on the same visit date were considered one  
28  
29 encounter. Management fee codes, which are codes used for care over a period of time were not  
30  
31 included, because the billing does not correspond one to one with an encounter.  
32  
33

34  
35 We categorized physician specialty and identified unique physicians through OHIP  
36  
37 billings. Billing codes are specific to each specialty and billings also include a unique identifier  
38  
39 for the submitting physician. In Ontario, any physician can bill the palliative care fee codes, and  
40  
41 in Canada palliative care is not a designated specialty. Therefore, to determine which physicians  
42  
43 had a focus of practice in palliative care, we used an existing algorithm that was validated in  
44  
45 family physicians which considered physicians of any specialty who billed 10% or more of  
46  
47 encounters using palliative care billing codes. The algorithm was developed based on three years  
48  
49 of data (2008-2011) to all physicians.<sup>35</sup> We applied the same billing codes over the period of  
50  
51 January 1, 2012 to December 31<sup>st</sup>, 2016 to the physicians providing care to decedents in the  
52  
53  
54  
55  
56  
57  
58  
59  
60

1  
2  
3 cohort. The physicians identified with this billing pattern (10% or more) in our data comprised  
4  
5 18.5% of physicians, and were grouped for analyses as palliative care focused physicians.  
6  
7

8  
9 Over the last 12 months and last 3 months of life, we examined the number and location  
10  
11 of physician encounters (office, home, telephone), number of unique physician specialties  
12  
13 involved per patient and specialty of physician, number of unique physicians involved per  
14  
15 patient, and the five most frequent types of specialties involved. These patterns were described  
16  
17 across the five mutually exclusive illness trajectories. The top causes of death included cancers  
18  
19 in the terminal illness trajectory, chronic respiratory and cardiovascular related causes in the  
20  
21 organ failure trajectory, cardiovascular, infection and dementia-related causes in the frailty  
22  
23 trajectory, accident and injury-related causes for the sudden death trajectory and infections, falls  
24  
25 and ill-defined unspecified causes in the other trajectory. Additional causes of death in each  
26  
27 trajectory can be found in Supplementary File 2. The decision to look at different time horizons  
28  
29 recognizes that palliative needs are more apparent and care patterns may change closer to end of  
30  
31 life.  
32  
33  
34  
35

### 36 37 **Analyses**

38  
39  
40  
41 Descriptive results are presented as proportions for categorical variables, and as mean  
42  
43 and standard deviation (SD), or median (with interquartile range for variables with skewed  
44  
45 distribution) for continuous variables. Results are presented by end-of-life trajectory. All  
46  
47 analyses were completed using SAS Enterprise Guide v. 7.15.  
48  
49  
50

## 51 **RESULTS**

52  
53  
54  
55  
56  
57  
58  
59  
60

1  
2  
3 From January 1, 2013 to December 31, 2016, there were 374,388 deaths among  
4 individuals aged 18 years and older. The average age of decedents was 77.1 years (SD 14.8),  
5  
6 49.8% were female, 13.9% resided in rural regions (Table 1). The distribution of illness  
7  
8 trajectories was 28.5% terminal illness, 33.8% organ failure, 27.0% frailty, 4.7% sudden death  
9  
10 and 6.0% other causes.  
11  
12  
13  
14  
15

16 In the last 12 months of life, 92.4% of decedents had at least one outpatient physician  
17 encounter, 78.5% had at least one family physician encounter and 59.9% at least one palliative  
18 care physician encounter. In the last 3 months of life, these proportions were 83.8%, 57.5% and  
19  
20 50.3%, respectively. The mean number of physician encounters in outpatient settings was 16.2  
21  
22 (SD 15.3) over the last 12 months of life, involving a mean of 3.6 (SD 2.4) unique specialties and  
23  
24 5.8 (SD 4.6) unique physicians (Table 2). In the last 12 months and three months of life,  
25  
26 decedents in the terminal illness trajectory experienced the highest mean number of outpatient  
27  
28 physician encounters and also had the highest mean number of unique specialties and unique  
29  
30 physicians, while decedents in the frailty trajectory had the least. In the last 12 months of life, the  
31  
32 mean number of palliative care physician encounters was also highest for decedents in the  
33  
34 terminal illness trajectory (mean 10.6, SD 12.7), compared to all other trajectories where there  
35  
36 were fewer than three encounters on average. The numbers of encounters, unique specialties and  
37  
38 unique physicians for decedents in the organ failure and the 'other' trajectories fell between the  
39  
40 terminal illness trajectory and the frailty trajectory. For the sudden death trajectory, the mean  
41  
42 number of encounters in the last 12 months of life was 11.8 (SD 14.4), however this trajectory  
43  
44 had the lowest number of encounters with a palliative care physician (mean 1.4, SD 4.0). The  
45  
46 findings that the highest mean number of encounters were provided for the terminal illness  
47  
48 trajectory and the lowest mean number for the frailty trajectory persisted in the last three months  
49  
50  
51  
52  
53  
54  
55  
56  
57  
58  
59  
60



1  
2  
3 of life. In the last 12 months and last three months of life, family physicians provided a higher  
4 mean number of encounters than palliative care physicians for all trajectories except terminal  
5 illness, where palliative care physicians provided a higher mean number of encounters.  
6  
7  
8  
9

10  
11 Figure 1 shows the five physician specialties with the highest number of outpatient  
12 encounters across each trajectory in the last 12 and three months of life. Family physicians and  
13 palliative care physicians were the two specialties with the highest encounter volumes for all  
14 trajectories in both time periods. Family physicians provided the highest volume of encounters  
15 (>30%) for all trajectories in the last 12 and three months of life, except for individuals dying  
16 with a terminal illness, where palliative care physicians provided the highest volume (40.6% in  
17 last 12 months and 56.3% in last three months). Therapeutic radiology (predominantly radiation  
18 oncology), medical oncology and internal medicine comprised the remaining top five specialties  
19 for the terminal illness trajectory over the last 12 and three months. Internal medicine,  
20 psychiatry, cardiology, ophthalmology, respirology, and orthopedic surgery comprised the  
21 remaining top five specialties for the other trajectories.  
22  
23  
24  
25  
26  
27  
28  
29  
30  
31  
32  
33  
34  
35  
36  
37

## 38 **DISCUSSION**

39  
40  
41 In this retrospective study of Ontarians in the last year of life, we found that decedents  
42 had numerous outpatient physician encounters with multiple physicians. Decedents in the  
43 terminal illness trajectory experienced the highest number of outpatient physician encounters  
44 overall and the highest number of different physicians providing care. Overall, family physicians  
45 and palliative care physicians provided approximately three-quarters of the outpatient encounters  
46 in the last 12 and three months of life. Palliative care physicians provided the highest volume of  
47  
48  
49  
50  
51  
52  
53  
54  
55  
56  
57  
58  
59  
60

1  
2  
3 outpatient encounters only for the decedents in the terminal illness trajectory and family  
4  
5 physicians provided the highest volume of care for all other trajectories.  
6  
7

8  
9 The finding that palliative care is more likely to be provided to patients with cancer  
10 versus other end-of-life trajectories is not new.<sup>7,36,37</sup> The variability in the rapidity and  
11 consistency of decline in non-cancer compared to cancer end-of-life trajectories suggest that  
12 models of care need to be adaptable to accommodate different trajectories.<sup>38</sup> Our results for non-  
13 cancer trajectories, where family physicians provided the highest volume of encounters may  
14 reflect the fluctuating declines in health for organ diseases and frailty that limit accurate  
15 prognostication of the timing of end of life and the less identifiable start of the terminal phase  
16 compared to cancer.<sup>9,23,39</sup> In addition, many palliative care clinics in Ontario provide care only to  
17 cancer patients because they are funded by cancer centres; therefore, increasing the onus of  
18 providing end-of-life care onto family physicians for non-cancer patients.  
19  
20  
21  
22  
23  
24  
25  
26  
27  
28  
29  
30  
31  
32

33 Decedents in the organ failure trajectory had fewer outpatient physician encounters than  
34 the terminal illness trajectory, but more encounters than the frailty trajectory. This finding may  
35 reflect an ongoing involvement of specialists focused on disease management, for example in  
36 cardiovascular and respiratory conditions. A previous study of the same illness trajectories found  
37 that initiation of palliative care was less frequent and later for decedents in the organ failure and  
38 frailty trajectories compared to the terminal illness trajectory.<sup>7</sup> It was interesting that the lowest  
39 mean number of palliative care physician encounters occurred for decedents in the sudden death  
40 trajectory, however, 33% of people in sudden death had at least one palliative care physician  
41 encounter. It may be that some decedents who were receiving palliative care for a short time died  
42 of a sudden cause or an unexpected complication.  
43  
44  
45  
46  
47  
48  
49  
50  
51  
52  
53  
54  
55  
56  
57  
58  
59  
60

1  
2  
3 The average number of outpatient specialties involved in care in the last year of life was  
4 nearly four, with an average of six different physicians involved. With multiple physicians  
5 involved in care, it is possible that continuity of care in the relational sense, could be disrupted.  
6  
7 Continuity of care with the same physician has been shown to be beneficial for patients near the  
8 end of life and is associated with reduced likelihood of intensive care use<sup>40</sup>, emergency  
9 department use and hospital death.<sup>41-44</sup> Our findings have implications for operationalizing  
10 Canada's national palliative care framework that has called for models of care led by primary  
11 care providers in a shared-care approach.<sup>45,46</sup>  
12  
13  
14  
15  
16  
17  
18  
19  
20  
21  
22

23 The study has some limitations. The health administrative data does not directly allow for  
24 assessment of the appropriateness or quality of care associated with outpatient physician  
25 encounters in the last year of life and whether patients' needs are met. This study is based on one  
26 province of Canada (representing approximately 40% of the population) and health care systems  
27 are organized provincially. Therefore, the results may not be entirely generalizable to other  
28 jurisdictions.  
29  
30  
31  
32  
33  
34  
35  
36  
37

38 The proportion of patients in our study who received care from a palliative care focused  
39 physician was higher than in previous studies that used the same method to identify such  
40 physicians in administrative data. The study that validated the identification method used all  
41 physicians rather than a sub-set providing care to people in the last year of life as we did.  
42  
43  
44  
45  
46  
47

48 In the last year of life, patients have many encounters with various physicians in  
49 outpatient settings and the volume and mix varies by end-of-life trajectory. For people with non-  
50 cancer trajectories, family physicians provide the majority of outpatient physician care and for  
51 people dying of cancer, palliative care physicians provide most of the care. These results have  
52  
53  
54  
55  
56  
57  
58  
59  
60

1  
2  
3  
4  
5  
6  
7  
8  
9  
10  
11  
12  
13  
14  
15  
16  
17  
18  
19  
20  
21  
22  
23  
24  
25  
26  
27  
28  
29  
30  
31  
32  
33  
34  
35  
36  
37  
38  
39  
40  
41  
42  
43  
44  
45  
46  
47  
48  
49  
50  
51  
52  
53  
54  
55  
56  
57  
58  
59  
60

implications for continuity of care and shared care near the end of life. To design systems that will meet population needs for care at the end of life, further research is needed on the best models to optimize the complementary roles of different physicians while maintaining adequate continuity.

Confidential

## DECLARATIONS

### Authorship

MH, SI, PT, AH conceived the study. All authors designed the study and interpreted the results. MH wrote the manuscript. All authors revised the manuscript critically for important intellectual content, gave final approval of the version to be published, and agreed to be accountable for all aspects of the work.

### Research ethics

The use of data in this project was authorized under section 45 of Ontario's *Personal Health Information Protection Act*, which does not require review by a Research Ethics Board.

### Data management and sharing

The data set from this study is held securely in coded form at ICES. While data sharing agreements prohibit ICES from making the data set publicly available, access may be granted to those who meet pre-specified criteria for confidential access, available at [www.ices.on.ca/DAS](http://www.ices.on.ca/DAS). The full data set creation plan and underlying analytic code are available from the authors upon request, understanding that the computer programs may rely upon coding templates or macros that are unique to ICES and are therefore either inaccessible or may require modification.

### Acknowledgements

This study was supported by ICES, which is funded by an annual grant from the Ontario Ministry of Health and Long-Term Care (MOHLTC). Parts of this material are based on data and information compiled and provided by CIHI and the MOHLTC. The analyses, conclusions, opinions and statements expressed herein are solely those of the authors and do not reflect those of the funding or data sources; no endorsement is intended or should be inferred.

Parts of this material are based on Ontario Registrar General information on deaths, the original source of which is Service Ontario. The views expressed therein are those of the authors and do not necessarily reflect those of Ontario Registrar General or Ministry of Government Services.

Parts of this material are based on the Ontario Drug Benefit claims database. We thank IMS Brogan Inc. for the use of their Drug Information Database.

Peter Tanuseputro is supported by a PSI Graham Farquharson Knowledge Translation Fellowship.

## REFERENCES

1. Lunney JR, Lynn J, Foley DJ, Lipson S, Guralnik JM. Patterns of functional decline at the end of life. *JAMA*. 2003;289:2387-92.
2. Fassbender K, Fainsinger RL, Carson M, Finegan BA. Cost Trajectories at the End of Life: The Canadian Experience. *J Pain Symptom Manage*. 2009;38:75-80.
3. Mathers CD, Loncar D. Projections of global mortality and burden of disease from 2002 to 2030. *PLoS Med*. 2006;3:e442.
4. Tanuseputro P, Wodchis WP, Fowler R, et al. The health care cost of dying: a population-based retrospective cohort study of the last year of life in Ontario, Canada. *PLoS One*. 2015;10:e0121759.
5. Brown C, Hsu AT, C K, et al. How are physicians delivering palliative care? A population-based retrospective cohort study describing the mix of generalist and specialist palliative care models in the last year of life. *Palliat Med*. 2018;32:1334-43.
6. Tanuseputro P, Budhwani S, Bai YQ, Wodchis WP. Palliative care delivery across health sectors: A population-level observational study. *Palliat Med*. 2017;31:247-57.
7. Seow H, O'Leary E, Perez R, Tanuseputro P. Access to palliative care by disease trajectory: a population-based cohort of Ontario decedents. *BMJ Open*. 2018;8:e021147.
8. Hight G, Crawford D, Murray SA, Boyd K. Development and evaluation of the Supportive and Palliative Care Indicators Tool (SPICT): a mixed-methods study. *BMJ Support Palliat Care*. 2014;4:285-90.
9. Murray SA, Kendall M, Mitchell G, Moine S, Amblas-Novellas J, Boyd K. Palliative care from diagnosis to death. *BMJ*. 2017;356:j878.
10. Murray SA, Kendall M, Boyd K, Sheikh A. Illness trajectories and palliative care. *BMJ*. 2005;330:1007-11.
11. Quill TE, Abernethy AP. Generalist plus Specialist Palliative Care — Creating a More Sustainable Model. *N Engl J Med*. 2013;368:1173-5.
12. Association CHPC. The Way Forward – Moving Towards an Integrated Palliative Approach to Care: Survey of GP/FPs and Nurses in Primary Care. 2014.
13. Sawatzky R, Porterfield P, Lee J, et al. Conceptual foundations of a palliative approach: a knowledge synthesis. *BMC Palliat Care*. 2016;15:5.
14. Organization WH. WHO | Palliative Care. Fact Sheet. *WHO*. 2017.
15. Beernaert K, Van den Block L, Van Thienen K, et al. Family physicians' role in palliative care throughout the care continuum: stakeholder perspectives. *Fam Pract*. 2015;32:694-700.
16. Liss DT, Chubak J, Anderson ML, Saunders KW, Tuzzio L, Reid RJ. Patient-reported care coordination: associations with primary care continuity and specialty care use. *Ann Fam Med*. 2011;9:323-9.
17. Chen LM, Ayanian JZ. Care Continuity and Care Coordination. *JAMA Intern Med*. 2014;174:749.
18. Qureshi D, Tanuseputro P, Perez R, Pond GR, Seow HY. Early initiation of palliative care is associated with reduced late-life acute-hospital use: A population-based retrospective cohort study. *Palliat Med*. 2019;33:150-9.
19. Qureshi D, Tanuseputro P, Perez R, Seow H. Place of Care Trajectories in the Last Two Weeks of Life: A Population-Based Cohort Study of Ontario Decedents. *J Palliat Med*. 2018;21:1588-95.

- 1
  - 2
  - 3
  - 4
  - 5
  - 6
  - 7
  - 8
  - 9
  - 10
  - 11
  - 12
  - 13
  - 14
  - 15
  - 16
  - 17
  - 18
  - 19
  - 20
  - 21
  - 22
  - 23
  - 24
  - 25
  - 26
  - 27
  - 28
  - 29
  - 30
  - 31
  - 32
  - 33
  - 34
  - 35
  - 36
  - 37
  - 38
  - 39
  - 40
  - 41
  - 42
  - 43
  - 44
  - 45
  - 46
  - 47
  - 48
  - 49
  - 50
  - 51
  - 52
  - 53
  - 54
  - 55
  - 56
  - 57
  - 58
  - 59
  - 60
20. Mitchell G, Murray SA. Supportive and palliative care in the age of deferred death: primary care's central role. *BMJ Support Palliat Care*. 2020.
21. May CR, Cummings A, Myall M, et al. Experiences of long-term life-limiting conditions among patients and carers: what can we learn from a meta-review of systematic reviews of qualitative studies of chronic heart failure, chronic obstructive pulmonary disease and chronic kidney disease? *BMJ Open*. 2016;6:e011694.
22. Sav A, Kendall E, McMillan SS, et al. 'You say treatment, I say hard work': treatment burden among people with chronic illness and their carers in Australia. *Health Soc Care Community*. 2013;21:665-74.
23. Gill TM, Gahbauer EA, Han L, Allore HG. Trajectories of disability in the last year of life. *N Engl J Med*. 2010;362:1173-80.
24. Information ClfH. *Health care use at the end of life in Atlantic Canada*. Ottawa2011.
25. Muggah E, Graves E, Bennett C, Manuel DG. The impact of multiple chronic diseases on ambulatory care use; a population based study in Ontario, Canada. *BMC Health Serv Res*. 2012;12:452.
26. Lane NE, Maxwell CJ, Gruneir A, Bronskill SE, Wodchis WP. Absence of a Socioeconomic Gradient in Older Adults' Survival with Multiple Chronic Conditions. *EBioMedicine*. 2015;2:2094-100.
27. Jaakkimainen RL, Bronskill SE, Tierney MC, et al. Identification of Physician-Diagnosed Alzheimer's Disease and Related Dementias in Population-Based Administrative Data: A Validation Study Using Family Physicians' Electronic Medical Records. *J Alzheimers Dis*. 2016;54:337-49.
28. Mondor L, Cohen D, Khan AI, Wodchis WP. Income inequalities in multimorbidity prevalence in Ontario, Canada: a decomposition analysis of linked survey and health administrative data. *Int J Equity Health*. 2018;17:90.
29. Mondor L, Maxwell CJ, Bronskill SE, Gruneir A, Wodchis WP. The relative impact of chronic conditions and multimorbidity on health-related quality of life in Ontario long-stay home care clients. *Qual Life Res*. 2016;25:2619-32.
30. Mondor L, Maxwell CJ, Hogan DB, et al. Multimorbidity and healthcare utilization among home care clients with dementia in Ontario, Canada: A retrospective analysis of a population-based cohort. *PLoS Med*. 2017;14:e1002249.
31. Gruneir A, Bronskill SE, Maxwell CJ, et al. The association between multimorbidity and hospitalization is modified by individual demographics and physician continuity of care: a retrospective cohort study. *BMC Health Serv Res*. 2016;16:154.
32. Pefoyo AJ, Bronskill SE, Gruneir A, et al. The increasing burden and complexity of multimorbidity. *BMC Public Health*. 2015;15:415.
33. Petrosyan Y, Bai YQ, Kone Pefoyo AJ, et al. The Relationship between Diabetes Care Quality and Diabetes-Related Hospitalizations and the Modifying Role of Comorbidity. *Can J Diabetes*. 2017;41:17-25.
34. Thavorn K, Maxwell CJ, Gruneir A, et al. Effect of socio-demographic factors on the association between multimorbidity and healthcare costs: a population-based, retrospective cohort study. *BMJ Open*. 2017;7:e017264.
35. Barbera L, Hwee J, Klinger C, Jembere N, Seow H, Pereira J. Development and validation of an algorithm to identify palliative care physicians among primary care physicians. *CMAJ Open*. 2015;3:E292-E8.

- 1
  - 2
  - 3
  - 4
  - 5
  - 6
  - 7
  - 8
  - 9
  - 10
  - 11
  - 12
  - 13
  - 14
  - 15
  - 16
  - 17
  - 18
  - 19
  - 20
  - 21
  - 22
  - 23
  - 24
  - 25
  - 26
  - 27
  - 28
  - 29
  - 30
  - 31
  - 32
  - 33
  - 34
  - 35
  - 36
  - 37
  - 38
  - 39
  - 40
  - 41
  - 42
  - 43
  - 44
  - 45
  - 46
  - 47
  - 48
  - 49
  - 50
  - 51
  - 52
  - 53
  - 54
  - 55
  - 56
  - 57
  - 58
  - 59
  - 60
36. Gadoud A, Kane E, Oliver SE, Johnson MJ, Macleod U, Allgar V. Palliative care for non-cancer conditions in primary care: a time trend analysis in the UK (2009-2014). *BMJ Support Palliat Care*. 2020.
37. Rosenwax L, Spilsbury K, McNamara BA, Semmens JB. A retrospective population based cohort study of access to specialist palliative care in the last year of life: who is still missing out a decade on? *BMC Palliat Care*. 2016;15:46.
38. Morin L, Aubry R, Frova L, et al. Estimating the need for palliative care at the population level: A cross-national study in 12 countries. *Palliat Med*. 2017;31:526-36.
39. Thorne S, Roberts D, Sawatzky R. Unravelling the Tensions Between Chronic Disease Management and End-of-Life Planning. *Res Theory Nurs Pract*. 2016;30:91-103.
40. Ankuda CK, Petterson SM, Wingrove P, Bazemore AW. Regional Variation in Primary Care Involvement at the End of Life. *Ann Fam Med*. 2017;15:63-7.
41. Burge F, Lawson B, Johnston G. Family physician continuity of care and emergency department use in end-of-life cancer care. *Med Care*. 2003;41:992-1001.
42. Almaawiy U, Pond GR, Sussman J, Brazil K, Seow H. Are family physician visits and continuity of care associated with acute care use at end-of-life? A population-based cohort study of homecare cancer patients. *Palliat Med*. 2014;28:176-83.
43. Burge F, Lawson B, Johnston G, Cummings I. Primary Care Continuity and Location of Death for Those with Cancer. *J Palliat Med*. 2003;6:911-8.
44. Kim SL, Tarn DM. Effect of Primary Care Involvement on End-of-Life Care Outcomes: A Systematic Review. *J Am Geriatr Soc*. 2016;64:1968-74.
45. Morrison RS. A National Palliative Care Strategy for Canada. *J Palliat Med*. 2018;21:S63-S75.
46. Pereira J, Chary S, Moat JB, et al. Pallium Canada's Curriculum Development Model: A Framework to Support Large-Scale Courseware Development and Deployment. *J Palliat Med*. 2020;23:759-66.



Table 1: Profile of decedents aged 18 years or older who died between January 1, 2013 and December 31, 2016, in Ontario, Canada.

| Variable                               | End-of-life Trajectory           |                               |                         |                             |                      | Total Cohort<br>(n= 374,388) |
|----------------------------------------|----------------------------------|-------------------------------|-------------------------|-----------------------------|----------------------|------------------------------|
|                                        | Terminal Illness<br>(n= 106,866) | Organ Failure<br>(n= 126,534) | Frailty<br>(n= 100,917) | Sudden Death<br>(n= 17,761) | Other<br>(n= 22,310) |                              |
| Age at death in years,<br>n (%)        |                                  |                               |                         |                             |                      |                              |
| 18-44                                  | 2,477(2.3%)                      | 2,745 (2.2%)                  | 764 (0.8%)              | 5,025 (28.3%)               | 886 (4.0%)           | 11,897 (3.2%)                |
| 45-54                                  | 6,716 (6.3%)                     | 5,338 (4.2%)                  | 2,461 (2.4%)            | 2,905 (16.4%)               | 966 (4.3%)           | 18,386 (4.9%)                |
| 55-64                                  | 17,040 (15.9%)                   | 12,430 (9.8%)                 | 6,652 (6.6%)            | 2,729 (15.4%)               | 1,776 (8.0%)         | 40,627 (10.9%)               |
| 65-74                                  | 26,874 (25.1%)                   | 20,350 (16.1%)                | 12,165 (12.1%)          | 1,967 (11.1%)               | 2,751 (12.3%)        | 64,107 (17.1%)               |
| 75-84                                  | 30,860 (28.9%)                   | 34,532 (27.3%)                | 25,731 (25.5%)          | 2,231 (12.6%)               | 5,632 (25.2%)        | 98,986 (26.4%)               |
| 85-94                                  | 20,748 (19.4%)                   | 42,650 (33.7%)                | 42,181 (41.8%)          | 2,434 (13.7%)               | 8,275 (37.1%)        | 116,288 (31.1%)              |
| 95+                                    | 2,151 (2.0%)                     | 8,489 (6.7%)                  | 10,963 (10.9%)          | 470 (2.6%)                  | 2,024 (9.1%)         | 24,097 (6.4%)                |
| Mean (SD)                              | 73.3 (13.1)                      | 78.4 (13.8)                   | 82.3 (12.1)             | 58.7 (21.8)                 | 79.1 (15.4)          | 77.1 (14.8)                  |
| Median (IQR)                           | 75 (65-83)                       | 82 (70-89)                    | 85 (76-91)              | 58 (42-78)                  | 83 (72-90)           | 80 (68-88)                   |
| Female, n (%)                          | 51,414 (48.1%)                   | 64,318 (50.8%)                | 52,611 (52.1%)          | 6,371 (35.9%)               | 11,809 (52.9%)       | 186,523 (49.8%)              |
| Rural residence, n (%)                 | 15,143 (14.2%)                   | 18,586 (14.7%)                | 13,251 (13.1%)          | 2,518 (14.2%)               | 2,564 (11.5%)        | 52,062 (13.9%)               |
| Neighborhood Income<br>Quintile, n (%) |                                  |                               |                         |                             |                      |                              |
| 1 (lowest)                             | 24,494 (22.9%)                   | 33,525 (26.5%)                | 26,608 (26.4%)          | 5,153 (29.0%)               | 5,834 (26.2%)        | 95,614 (25.5%)               |
| 2                                      | 23,230 (21.7%)                   | 27,880 (22.0%)                | 21,948 (21.8%)          | 3,777 (21.3%)               | 4,896 (22.0%)        | 81,731 (21.8%)               |
| 3                                      | 21,009 (19.7%)                   | 23,889 (18.9%)                | 18,925 (18.8%)          | 3,215 (18.1%)               | 4,252 (19.1%)        | 71,290 (19.0%)               |
| 4                                      | 19,128 (17.9%)                   | 21,444 (17.0%)                | 17,024 (16.9%)          | 2,858 (16.1%)               | 3,719 (16.7%)        | 64,173 (17.1%)               |
| 5 (highest)                            | 18,750 (17.6%)                   | 19,341 (15.3%)                | 16,024 (15.9%)          | 2,678 (15.1%)               | 3,536 (15.9%)        | 60,329 (16.1%)               |
| Illness History, n (%)                 |                                  |                               |                         |                             |                      |                              |
| Cancer                                 | 98,681 (92.3%)                   | 28,121 (22.2%)                | 16,565 (16.4%)          | 2,371 (13.4%)               | 5,285 (23.7%)        | 151,023 (40.3%)              |
| CHF                                    | 20,809 (19.5%)                   | 56,184 (44.4%)                | 39,093 (38.7%)          | 2,538 (14.3%)               | 8,196 (36.7%)        | 126,820 (33.9%)              |
| COPD                                   | 22,532 (21.1%)                   | 40,380 (31.9%)                | 23,087 (22.9%)          | 2,212 (12.5%)               | 5,304 (23.8%)        | 93,515 (25.0%)               |
| Renal Disease                          | 23,488 (22.0%)                   | 41,654 (32.9%)                | 26,817 (26.6%)          | 2,401 (13.5%)               | 6,922 (31.0%)        | 101,282 (27.1%)              |

Table 2: Outpatient physician encounters in last 12 months and last 3 months of life among decedents who died in Ontario, Canada from 2013 to 2016, by end-of-life trajectory

| Time Frame             | Outcome of Interest                              | End-of-Life Trajectory        |                       |                            |                       |                      |                       |                          |                       |                   |                       | Total Cohort (n= 374,388) |              |                       |
|------------------------|--------------------------------------------------|-------------------------------|-----------------------|----------------------------|-----------------------|----------------------|-----------------------|--------------------------|-----------------------|-------------------|-----------------------|---------------------------|--------------|-----------------------|
|                        |                                                  | Terminal Illness (n= 106,866) |                       | Organ Failure (n= 126,534) |                       | Frailty (n= 100,917) |                       | Sudden Death (n= 17,761) |                       | Other (n= 22,310) |                       |                           |              |                       |
|                        |                                                  | Mean (SD)                     | N (%), any encounters | Mean (SD)                  | N (%), any encounters | Mean (SD)            | N (%), any encounters | Mean (SD)                | N (%), any encounters | Mean (SD)         | N (%), any encounters | Mean (SD)                 | Median (IQR) | N (%), any encounters |
| Last 12 months of life | No. encounters with all physicians               | 26.2 (17.0)                   | 105,650 (98.9%)       | 13.7 (12.9)                | 117,596 (92.9%)       | 9.9 (11.3)           | 86,031 (85.3%)        | 11.8 (14.4)              | 15,823 (89.1%)        | 13.5 (12.8)       | 20,776 (93.1%)        | 16.2 (15.3)               | 12 (4, 24)   | 345,876 (92.4%)       |
|                        | No. encounters with a family physician           | 6.7 (6.6)                     | 93,655 (87.6%)        | 5.8 (7.3)                  | 99,226 (78.4%)        | 4.5 (6.5)            | 69,893 (69.3%)        | 6.5 (11.1)               | 13,734 (77.3%)        | 5.6 (7.3)         | 17,260 (77.4%)        | 5.7 (7.2)                 | 4 (1, 8)     | 293,768 (78.5%)       |
|                        | No. encounters with a palliative care specialist | 10.6 (12.7)                   | 92,744 (86.8%)        | 2.9 (6.0)                  | 68,980 (54.5%)        | 2.1 (5.1)            | 44,268 (43.9%)        | 1.4 (4.0)                | 5,885 (33.1%)         | 2.9 (5.8)         | 12,426 (55.7%)        | 4.8 (9.0)                 | 1 (0, 6)     | 224,303 (59.9%)       |
|                        | No. unique specialties involved                  | 4.9 (2.3)                     | -                     | 3.4 (2.3)                  | -                     | 2.6 (2.2)            | -                     | 2.7 (2.1)                | -                     | 3.5 (2.4)         | -                     | 3.6 (2.4)                 | 3 (2, 5)     | -                     |
|                        | No. unique physicians involved                   | 8.7 (4.7)                     | -                     | 5.2 (4.2)                  | -                     | 3.8 (3.7)            | -                     | 4.1 (3.9)                | -                     | 5.3 (4.3)         | -                     | 5.8 (4.6)                 | 5 (2, 8)     | -                     |
| Last 3 months of life  | No. encounters with all physicians               | 10.9 (8.6)                    | 102,852 (96.2%)       | 4.8 (5.2)                  | 105,937 (83.7%)       | 3.4 (4.3)            | 73,025 (72.4%)        | 3.7 (4.7)                | 13,116 (73.9%)        | 4.9 (5.0)         | 18,861 (84.5%)        | 6.1 (6.9)                 | 4 (1, 9)     | 313,791 (83.8%)       |
|                        | No. encounters with a family physician           | 2.1 (2.9)                     | 69,114 (64.7%)        | 1.6 (2.3)                  | 73,546 (58.1%)        | 1.3 (2.1)            | 50,439 (50.0%)        | 1.7 (3.1)                | 9,497 (53.5%)         | 1.5 (2.3)         | 12,531 (56.2%)        | 1.7 (2.5)                 | 1 (0, 2)     | 215,127 (57.5%)       |
|                        | No. encounters with a palliative care specialist | 6.1 (7.8)                     | 85,647 (80.1%)        | 1.6 (3.5)                  | 54,794 (43.3%)        | 1.1 (2.7)            | 33,450 (33.2%)        | 0.7 (2.2)                | 4,225 (23.8%)         | 1.5 (3.1)         | 10,179 (45.6%)        | 2.7 (5.4)                 | 1 (0, 3)     | 188,295 (50.3%)       |
|                        | No. unique specialties involved                  | 3.1 (1.6)                     | -                     | 2.4 (1.5)                  | -                     | 2.1 (1.3)            | -                     | 2.1 (1.4)                | -                     | 2.6 (1.5)         | -                     | 2.6 (1.5)                 | 2 (1, 3)     | -                     |
|                        | No. unique physicians involved                   | 5.0 (2.9)                     | -                     | 3.3 (2.4)                  | -                     | 2.8 (2.1)            | -                     | 2.8 (2.2)                | -                     | 3.5 (2.5)         | -                     | 3.7 (2.6)                 | 3 (1, 5)     | -                     |

Figure 1a: Top 5 physician specialties by volume of outpatient physician encounters and average number of encounters per specialty in last 12 months, among decedents who died in Ontario, Canada from 2013 to 2016, per end-of-life trajectory. Page 20 of 26

1  
2  
3  
4  
5  
6  
7  
8  
9  
10  
11  
12  
13  
14  
15  
16  
17  
18  
19  
20  
21  
22  
23  
24  
25  
26  
27  
28  
29  
30  
31  
32  
33  
34  
35  
36  
37  
38  
39  
40  
41  
42  
43  
44  
45  
46  
47  
48  
49  
50  
51  
52  
53  
54  
55  
56  
57  
58  
59  
60

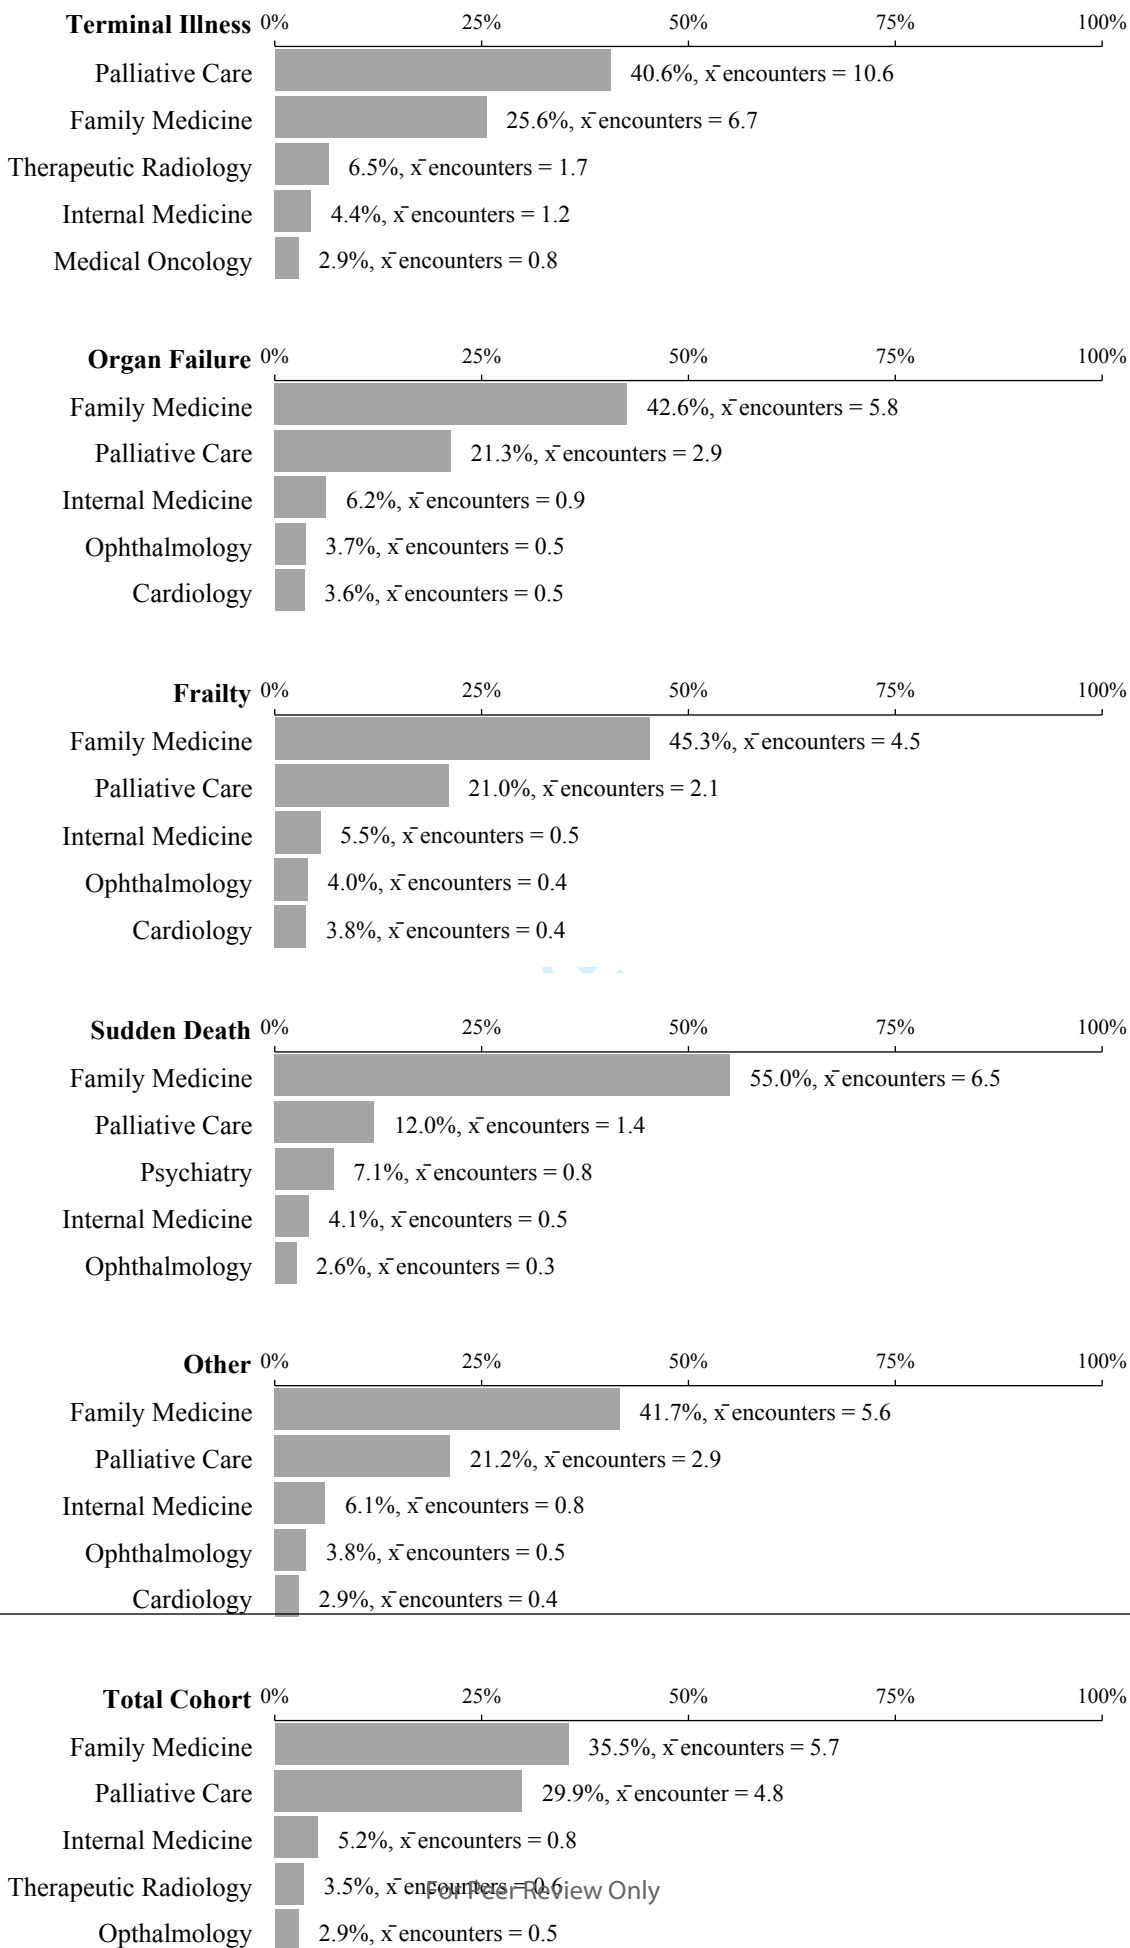

Figure 1b: Top 5 physician specialties by volume of outpatient physician encounters and average number of encounters per specialty in last 3 months, among decedents who died in Ontario, Canada from 2013 to 2016, per end-of-life trajectory.

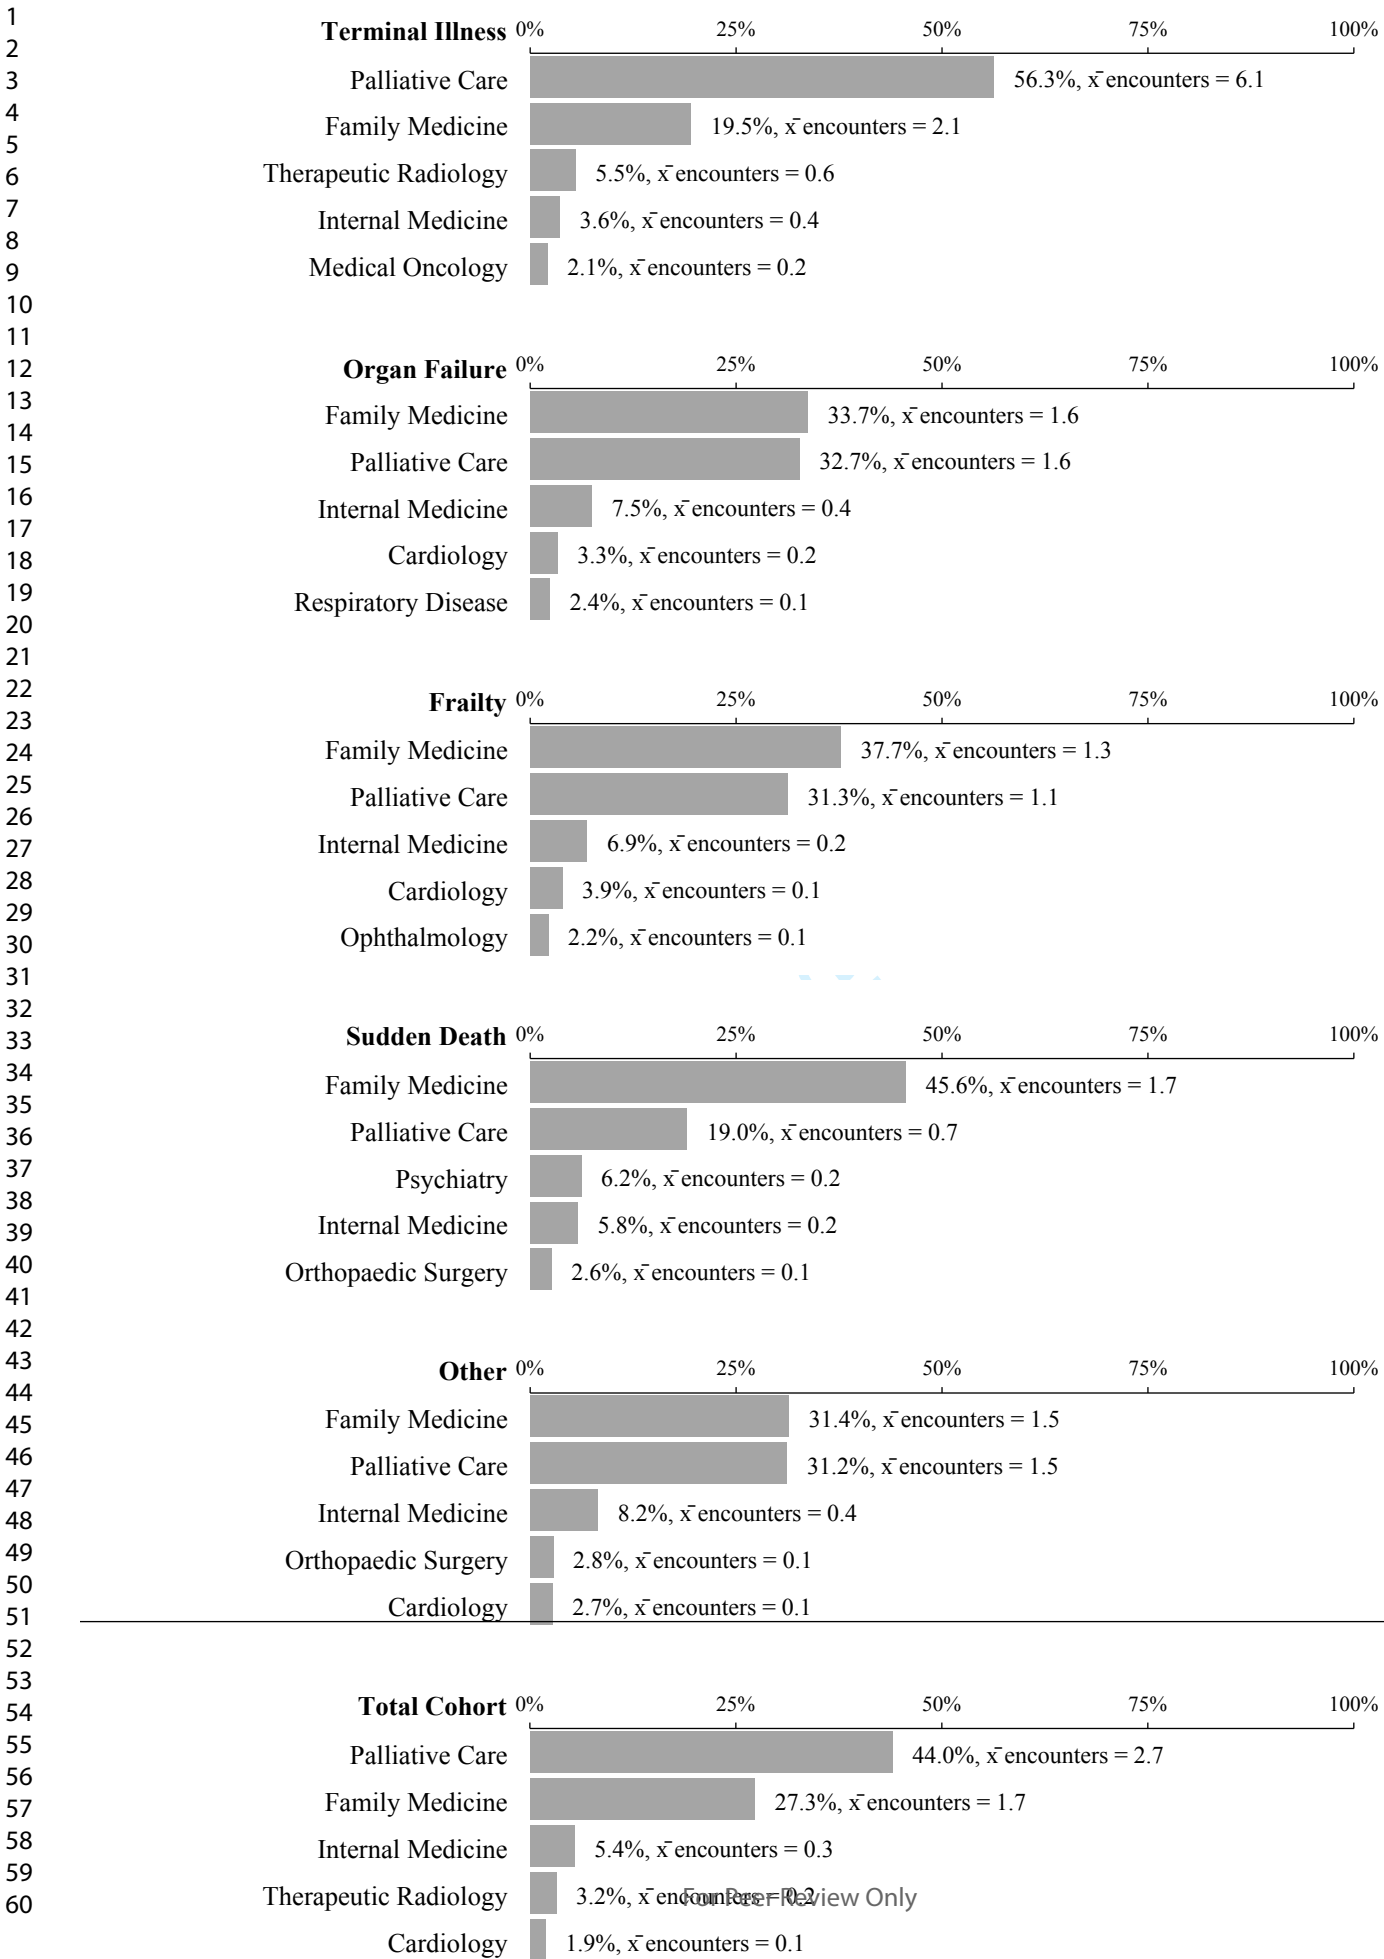

**Supplementary File 1: Description of health administrative databases held at ICES used in study**

| NAME OF DATABASE                                   | DATABASE CONTENT                                                                                                                                                                                                                                                                                                                                                                                                                                                                         |
|----------------------------------------------------|------------------------------------------------------------------------------------------------------------------------------------------------------------------------------------------------------------------------------------------------------------------------------------------------------------------------------------------------------------------------------------------------------------------------------------------------------------------------------------------|
| ICES-derived cohorts                               | Validated cohorts of individuals with specific diseases and conditions. These include: Ontario Asthma Dataset (ASTHMA); Congestive Heart Failure (CHF) database; Chronic Obstructive Pulmonary Disease (COPD) database; Ontario Dementia Dataset (DEMENTIA); Ontario Hypertension Dataset (HYPER); Ontario Crohn's and Colitis Cohort Dataset (OCCC); Ontario Diabetes Dataset (ODD); Ontario Myocardial Infarction Dataset (OMID); and the Ontario Rheumatoid Arthritis Dataset (ORAD). |
| Ontario Health Insurance Plan database (OHIP)      | These data record all claims by Ontario physicians for inpatient and ambulatory visits, consultations and procedures. The data also include claims from optometrists for publicly-funded reimbursement and from laboratories for all diagnostic tests performed.                                                                                                                                                                                                                         |
| Ontario Registered Persons Database (RPDB)         | Demographic, place of residence and vital status information for all persons eligible to receive insured health services in the province, including date of birth, sex, home address.                                                                                                                                                                                                                                                                                                    |
| Ontario Registrar General – Deaths (ORGD) database | This database contains information (demographic, place of death, cause of death) for all decedents in Ontario.                                                                                                                                                                                                                                                                                                                                                                           |
| Home Care Database (HCD)                           | This dataset contains clinical information for home care recipients. Information includes assessments, program admission dates, and service records.                                                                                                                                                                                                                                                                                                                                     |
| Ontario Drug Benefit Claims (ODB)                  | This database contains information (recipients, payments, claims, practitioners) for the Ontario Drug Benefit Program.                                                                                                                                                                                                                                                                                                                                                                   |
| Discharge Abstract Database (DAD)                  | This data captures patient-level information (administrative, clinical, and demographic) on hospital discharges. Discharges include deaths, sign-outs, and transfers to other healthcare settings.                                                                                                                                                                                                                                                                                       |

1  
2  
3  
4  
5  
6  
7  
8  
9  
10  
11  
12  
13  
14  
15  
16  
17  
18  
19  
20  
21  
22  
23  
24  
25  
26  
27  
28  
29  
30  
31  
32  
33  
34  
35  
36  
37  
38  
39  
40  
41  
42  
43  
44  
45  
46  
47

**Supplementary File 2: Top 15 causes of death, per end-of-life trajectory**

|          |                                                           | <b>End-of-life Trajectory</b> |                                                                  |                      |                                           |                |                                                                                                                       |                     |                                                                    |               |  |
|----------|-----------------------------------------------------------|-------------------------------|------------------------------------------------------------------|----------------------|-------------------------------------------|----------------|-----------------------------------------------------------------------------------------------------------------------|---------------------|--------------------------------------------------------------------|---------------|--|
|          |                                                           | <b>Terminal Illness</b>       |                                                                  | <b>Organ Failure</b> |                                           | <b>Frailty</b> |                                                                                                                       | <b>Sudden Death</b> |                                                                    | <b>Other</b>  |  |
|          | ICD-10 Code, Description                                  | Frequency (%)                 | ICD-10 Code, Description                                         | Frequency (%)        | ICD-10 Code, Description                  | Frequency (%)  | ICD-10 Code, Description                                                                                              | Frequency (%)       | ICD-10 Code, Description                                           | Frequency (%) |  |
| <b>1</b> | C349, Malignant neoplasm of bronchus and lung (C34)*      | 20,262 (19.0%)                | J449, Chronic obstructive pulmonary disease, unspecified         | 10,578 (8.3%)        | I251, Atherosclerotic heart disease       | 25,425 (25.2%) | R97, Abnormal tumour markers                                                                                          | 2,045 (11.5%)       | A419, Sepsis, unspecified                                          | 3,510 (15.7%) |  |
| <b>2</b> | C799, Secondary malignant neoplasm, unspecified site      | 18,098 (16.9%)                | I10, Essential (primary) hypertension                            | 9,486 (7.5%)         | F03, Unspecified dementia                 | 19,971 (19.8%) | W76, Other accidental hanging and strangulation                                                                       | 1,710 (9.6%)        | W18, Other fall on same level                                      | 2,453 (11.0%) |  |
| <b>3</b> | C800, Malignant neoplasm, primary site unknown, so stated | 7,164 (6.7%)                  | I6409, Stroke, not specified as Haemorrhage or infarction (I64)* | 8,352 (6.6%)         | J189, Pneumonia, unspecified              | 15,546 (15.4%) | X42, Accidental poisoning by and exposure to narcotics and psychodysleptics [hallucinogens], not elsewhere classified | 1,231 (6.9%)        | W19, Unspecified fall                                              | 2,362 (10.6%) |  |
| <b>4</b> | C61, Malignant neoplasm of prostate                       | 4,653 (4.4%)                  | I5009, Heart failure (I50)*                                      | 7,888 (6.2%)         | I2199, Acute myocardial infarction (I21)* | 8,576 (8.5%)   | X590, Exposure to unspecified factor causing fracture                                                                 | 1,095 (6.2%)        | R53, Malaise and fatigue                                           | 1,161 (5.2%)  |  |
| <b>5</b> | C259, Malignant neoplasm pancreas part unspecified        | 4,255 (4.0%)                  | I489, Atrial fibrillation and flutter (I48)*                     | 4,920 (3.9%)         | G309, Alzheimer's disease, unspecified    | 3,909 (3.9%)   | W80, Inhalation and ingestion of other objects causing obstruction of respiratory tract                               | 1,011 (5.7%)        | R999, Other ill-defined and unspecified causes of mortality (R99)* | 1,107 (5.0%)  |  |

| Terminal Illness         |                                                | Organ Failure            |                                                                       | Frailty                  |                                                    | Sudden Death             |                                                                                                                                                  | Other                    |                                                               |            |
|--------------------------|------------------------------------------------|--------------------------|-----------------------------------------------------------------------|--------------------------|----------------------------------------------------|--------------------------|--------------------------------------------------------------------------------------------------------------------------------------------------|--------------------------|---------------------------------------------------------------|------------|
| ICD-10 Code, Description | Frequency (%)                                  | ICD-10 Code, Description | Frequency (%)                                                         | ICD-10 Code, Description | Frequency (%)                                      | ICD-10 Code, Description | Frequency (%)                                                                                                                                    | ICD-10 Code, Description | Frequency (%)                                                 |            |
| 6                        | C189, Malignant neoplasm colon, unspecified    | 3,513 (3.3%)             | E149, Unspecified diabetes mellitus without (mention of) complication | 4,232 (3.3%)             | I259, Chronic ischaemic heart disease, unspecified | 3239 (3.2)               | X41, Accidental poisoning by and exposure to antiepileptic, sedative-hypnotic, antiparkinsonism and psychotropic drugs, not elsewhere classified | 704 (4.0%)               | R688, Other specified general symptoms and signs              | 789 (3.5%) |
| 7                        | C509, Malignant neoplasm of breast (C50)*      | 3,132 (2.9%)             | N390, Urinary tract infection, site not specified                     | 3,657 (2.9%)             | J690, Pneumonitis due to food and vomit            | 3230 (3.2)               | X45, Accidental poisoning by and exposure to alcohol                                                                                             | 677 (3.8%)               | W10, Fall on and from stairs and steps                        | 640 (2.9%) |
| 8                        | N189, Chronic kidney disease, unspecified      | 2,647 (2.5%)             | I709, Generalized and unspecified atherosclerosis                     | 3,177 (2.5%)             | G301, Alzheimer's disease with late onset          | 2494 (2.5)               | X44, Accidental poisoning by and exposure to other and unspecified drugs, medicaments and biological substances                                  | 594 (3.3%)               | R13, Dysphagia                                                | 579 (2.6%) |
| 9                        | C859, Non-Hodgkin's lymphoma, unspecified type | 1,838 (1.7%)             | J841, Other interstitial pulmonary diseases with fibrosis             | 2,568 (2.0%)             | G2009, Parkinson's disease (G20)*                  | 2302 (2.3)               | X599, Exposure to unspecified factor causing other and unspecified injury                                                                        | 492 (2.8%)               | W01, Fall on same level from slipping, tripping and stumbling | 522 (2.3%) |
| 10                       | C900, Multiple myeloma                         | 1,789 (1.7%)             | N19, Unspecified kidney failure                                       | 2,466 (2.0%)             | R54, Senility                                      | 2139 (2.1)               | V892, Person injured in unspecified                                                                                                              | 417 (2.3%)               | F329, Depressive                                              | 514 (2.3%) |

1  
2  
3  
4  
5  
6  
7  
8  
9  
10  
11  
12  
13  
14  
15  
16  
17  
18  
19  
20  
21  
22  
23  
24  
25  
26  
27  
28  
29  
30  
31  
32  
33  
34  
35  
36  
37  
38  
39  
40  
41  
42  
43  
44  
45  
46  
47

| Terminal Illness         |                                                                        | Organ Failure            |                                                                                                           | End-of-life Trajectory   |                                                   | Sudden Death             |                                                                                        | Other                          |                                         |            |
|--------------------------|------------------------------------------------------------------------|--------------------------|-----------------------------------------------------------------------------------------------------------|--------------------------|---------------------------------------------------|--------------------------|----------------------------------------------------------------------------------------|--------------------------------|-----------------------------------------|------------|
|                          |                                                                        |                          |                                                                                                           | Frailty                  |                                                   |                          |                                                                                        |                                |                                         |            |
| ICD-10 Code, Description | Frequency (%)                                                          | ICD-10 Code, Description | Frequency (%)                                                                                             | ICD-10 Code, Description | Frequency (%)                                     | ICD-10 Code, Description | Frequency (%)                                                                          | ICD-10 Code, Description       | Frequency (%)                           |            |
|                          |                                                                        |                          |                                                                                                           |                          |                                                   |                          |                                                                                        | traffic motor-vehicle accident | episode, unspecified                    |            |
| <b>11</b>                | C679, Malignant neoplasm of bladder, unspecified                       | 1,749 (1.6%)             | F179, Mental and behavioural disorders due to use of tobacco, unspecified mental and behavioural disorder | 2,355 (1.9%)             | I255, Ischaemic cardiomyopathy                    | 1072 (1.1)               | W34, Accidental discharge and malfunction from other and unspecified firearms and guns | 404 (2.3%)                     | W06, Fall involving bed                 | 369 (1.7%) |
| <b>12</b>                | C159, Malignant lesion oesophagus unspecified                          | 1,744 (1.6%)             | I469, Cardiac arrest, unspecified                                                                         | 2,191 (1.7%)             | A047, Enterocolitis due to Clostridium difficile  | 937 (0.9)                | W79, Inhalation and ingestion of food causing obstruction of respiratory tract         | 246 (1.4%)                     | R568, Other and unspecified convulsions | 358 (1.6%) |
| <b>13</b>                | C439, Malignant melanoma of skin, unspecified                          | 1,601 (1.5%)             | E119, Type 2 diabetes mellitus without (mention of) complications                                         | 2,111 (1.7%)             | F019, Vascular dementia, unspecified              | 833 (0.8)                | X80, Intentional self-harm by jumping from a high place                                | 244 (1.4%)                     | R64, Cachexia                           | 347 (1.6%) |
| <b>14</b>                | C787, Secondary malignant neoplasm of liver and intrahepatic bile duct | 1,594 (1.5%)             | K746, Other and unspecified cirrhosis of liver                                                            | 2,061 (1.6%)             | I6949, Sequelae of cerebrovascular disease (I69)* | 702 (0.7)                | X47, Accidental poisoning by and exposure to other gases and vapours                   | 231 (1.3%)                     | R092, Respiratory arrest                | 323 (1.4%) |
| <b>15</b>                | C169, Malignant neoplasm stomach unspecified                           | 1,464 (1.4%)             | K922, Gastrointestinal haemorrhage, unspecified                                                           | 1,998 (1.6%)             | E86, Volume depletion                             | 689 (0.7)                | V877, Person injured in collision between other                                        | 218 (1.2%)                     | F059, Delirium, unspecified             | 244 (1.1%) |



1  
2  
3  
4  
5  
6  
7  
8  
9  
10  
11  
12  
13  
14  
15  
16  
17  
18  
19  
20  
21  
22  
23  
24  
25  
26  
27  
28  
29  
30  
31  
32  
33  
34  
35  
36  
37  
38  
39  
40  
41  
42  
43  
44  
45  
46  
47

| <b>Terminal Illness</b>  |               | <b>Organ Failure</b>     |               | <b><u>End-of-life Trajectory</u></b> |               | <b>Sudden Death</b>      |               | <b>Other</b>             |               |
|--------------------------|---------------|--------------------------|---------------|--------------------------------------|---------------|--------------------------|---------------|--------------------------|---------------|
| ICD-10 Code, Description | Frequency (%) | ICD-10 Code, Description | Frequency (%) | ICD-10 Code, Description             | Frequency (%) | ICD-10 Code, Description | Frequency (%) | ICD-10 Code, Description | Frequency (%) |

specified motor vehicle (traffic)

Confidential

1  
2  
3  
4  
5  
6  
7  
8  
9  
10  
11  
12  
13  
14  
15  
16  
17  
18  
19  
20  
21  
22  
23  
24  
25  
26  
27  
28  
29  
30  
31  
32  
33  
34  
35  
36  
37  
38  
39  
40  
41  
42  
43  
44  
45  
46  
47  
48  
49  
50  
51  
52  
53  
54  
55  
56  
57  
58  
59  
60

Confidential
